# Supplementary material for: A highly stable and sensitive ethanol sensor based on Ru-decorated 1D WO3 nanowires
Source: Royal Society of Chemistry journal article supplement (doi:10.1039/d1ra06623d), 2021-01-01
Supplement: d1ra06623d1.pdf [file d1ra06623d1.pdf]

## Supporting Information

of

### **A highly stable and sensitive ethanol sensor based on Ru-decorated 1D WO<sub>3</sub> nanowires**

Jianjun Li<sup>a</sup>, Qionglin Ding<sup>a</sup>, Xichao Mo<sup>a</sup>, Zihao Zou<sup>b</sup>, Pu Cheng<sup>b</sup>, Yiding Li<sup>b</sup>, Kai Sun<sup>b</sup>, Yujun Fu<sup>b</sup>, Yangrong Wang<sup>a\*</sup>, and Deyan He<sup>b</sup>

*<sup>a</sup>School of Physical Science and Technology, Lanzhou University, Lanzhou 730000, China*

*<sup>b</sup>School of Materials and Energy, Lanzhou University, Lanzhou 730000, China*

---

\*Corresponding author.

E-mail address: [wyr@lzu.edu.cn](mailto:wyr@lzu.edu.cn) (Y. Wang).

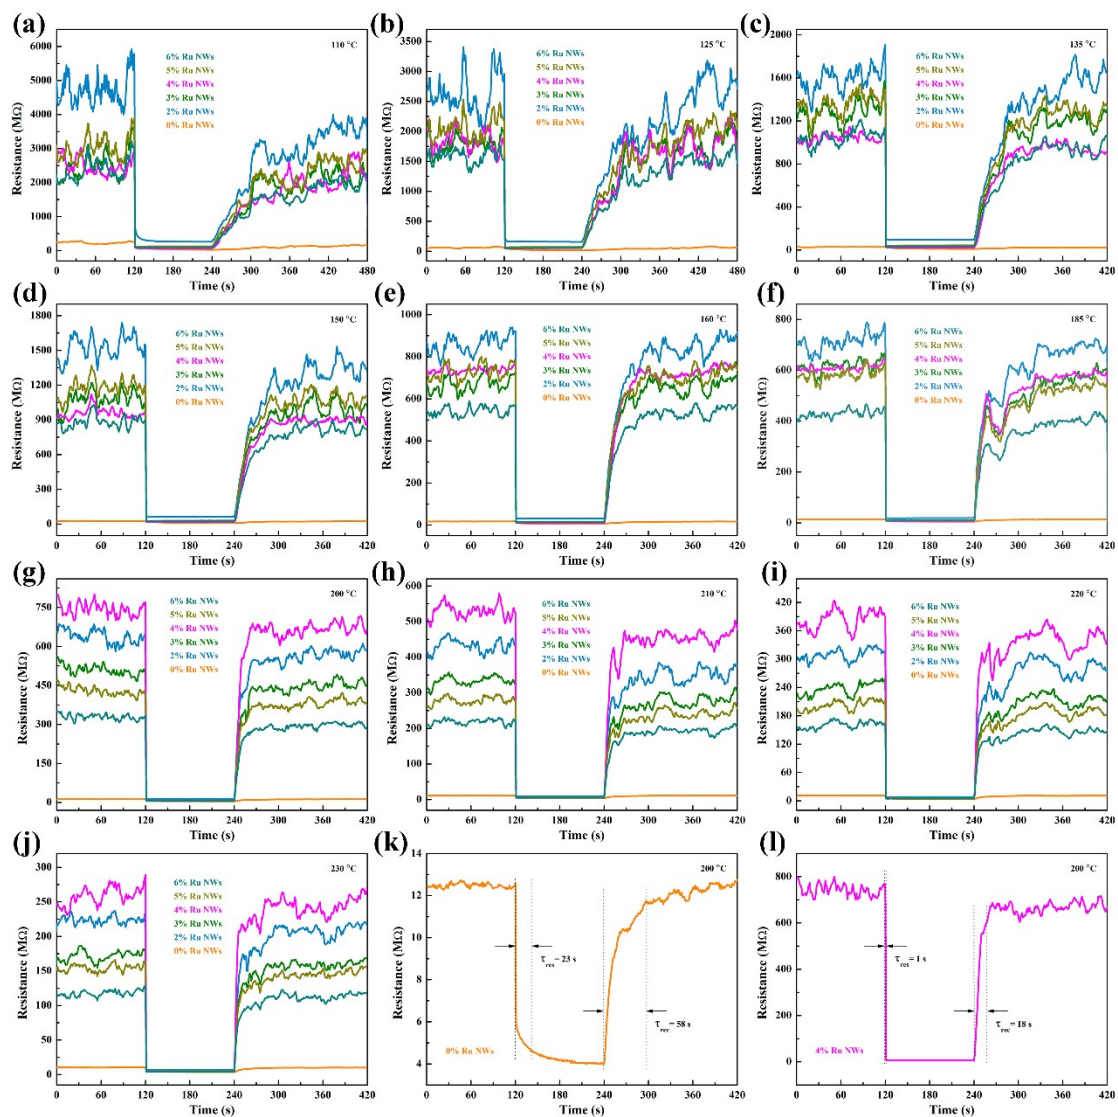

**Fig. S1.** (a-j) Dynamic resistance transition curves of sensors to 100 ppm ethanol at various temperatures (110–230 °C); (k, l) dynamic resistance change curves of sensors based on 0%, 4% Ru NWs samples to 100 ppm ethanol at 200 °C.

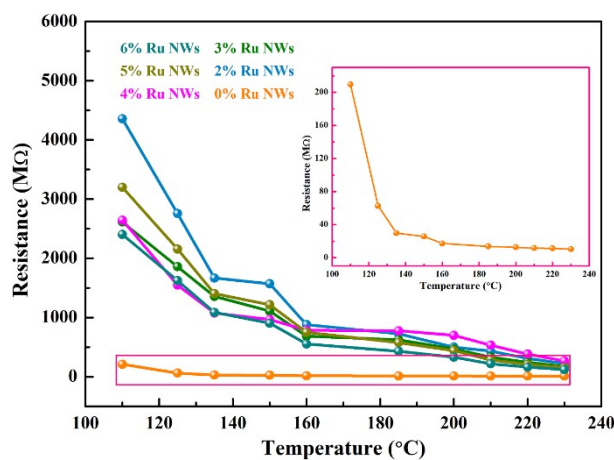

**Fig. S2.** The baseline resistance curves of sensors under air condition as a function of operating temperature.

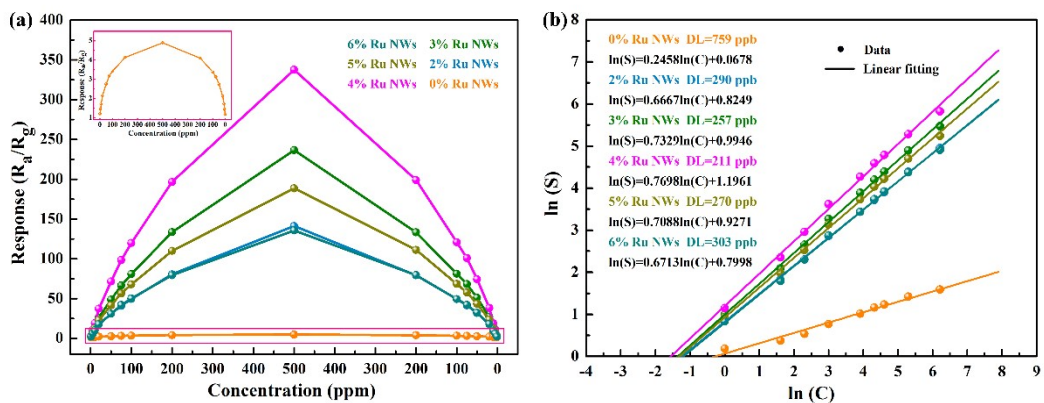

**Fig. S3.** (a) Corresponding response values for Fig. 4d, (b) the relationship between  $\ln(S)$  and  $\ln(C)$ , S: response values of sensors, C: the concentration of ethanol, DL: detection limit.

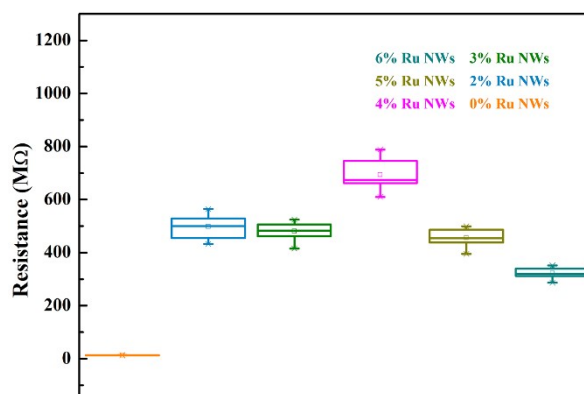

**Fig. S4.** Statistics of initial resistance for sensors selectivity and repeatability tests.

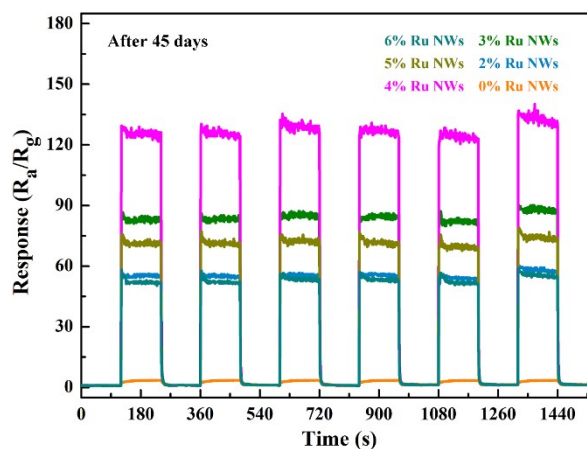

**Fig. S5.** Repeatability test dynamic response curves of sensors with six cycles under 100 ppm ethanol at 200 °C after being placed in air condition for 45 days.

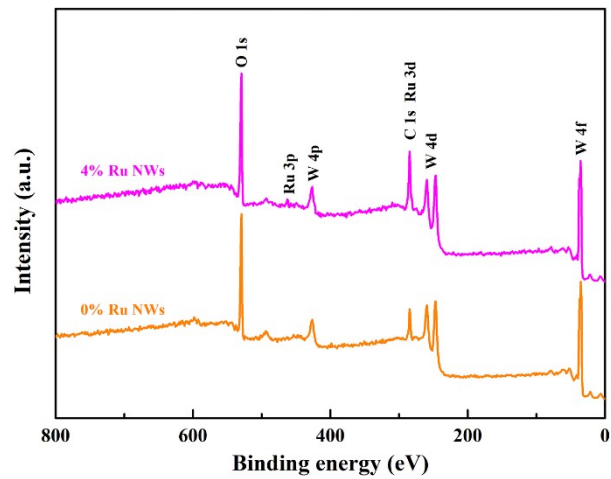

**Fig. S6.** XPS full survey spectra of 0%, 4% Ru NWs.
